# Supplementary material for: A systematic review of the inhibitory effect of extracts from edible parts of nuts on α-glucosidase activity
Source: Royal Society of Chemistry journal article supplement (doi:10.1039/d3fo00328k), 2023-01-01
Supplement: d3fo00328k1.pdf [file d3fo00328k1.pdf]

**Supplementary Table 1. Quality assessment of included papers.**

| Criteria                                                                                                                                                                                                                                                               | Adefegha et al., 2016 | Akyuz et al., 2022 | Attaallah et al., 2021 | de Souza et al., 2020 | Gu et al., 2020 | Loizzo et al., 2021 | Manhivi et al., 2022 | Noguera-Artiaga et al., 2019 | Pino Ramos et al., 2019 | Simsek ., 2021 | Sut et al., 2020 | Tsujita et al., 2022 | Wang et al., 2018 | Wang et al., 2020 | Zhu et al., 2019 |
|------------------------------------------------------------------------------------------------------------------------------------------------------------------------------------------------------------------------------------------------------------------------|-----------------------|--------------------|------------------------|-----------------------|-----------------|---------------------|----------------------|------------------------------|-------------------------|----------------|------------------|----------------------|-------------------|-------------------|------------------|
| 1 - Is the test substance identified?                                                                                                                                                                                                                                  | ✓                     | ✓                  | ✓                      | ✗                     | ✓               | ✓                   | ✓                    | ✗                            | ✓                       | ✓              | ✓                | ✓                    | ✓                 | ✓                 | ✓                |
| 2 - Is the concentration and purity of the test substance given?                                                                                                                                                                                                       | ✓                     | ✓                  | ✗                      | ✓                     | ✓               | ✓                   | ✓                    | ✓                            | ✓                       | ✓              | ✓                | ✓                    | ✗                 | ✓                 | ✓                |
| 3 - Is information on the source of all substances given?<br>a) Source/origin and supplier of the main test substance(s) is essential<br>b) Source/supplier of all other chemicals is expected (e.g. enzyme assay substrate, enzyme, reagents, solvents, buffer, etc.) | ✓                     | ✓                  | ✗                      | ✓                     | ✓               | ✓                   | ✓                    | ✓                            | ✓                       | ✗              | ✓                | ✓                    | ✓                 | ✓                 | ✓                |
|                                                                                                                                                                                                                                                                        | ✗                     | ✓                  | ✓                      | ✓                     | ✓               | ✓                   | ✗                    | ✗                            | ✗                       | ✓              | ✗                | ✓                    | ✓                 | ✗                 | ✓                |
| 4 - Is all information on the preparation of the test substance given?                                                                                                                                                                                                 | ✓                     | ✓                  | ✗                      | ✓                     | ✓               | ✓                   | ✓                    | ✗                            | ✓                       | ✓              | ✓                | ✓                    | ✗                 | ✓                 | ✓                |
| 5 - Is the enzyme assay well described?                                                                                                                                                                                                                                | ✓                     | ✓                  | ✗                      | ✓                     | ✓               | ✗                   | ✓                    | ✗                            | ✗                       | ✗              | ✗                | ✗                    | ✓                 | ✓                 | ✓                |
| 6 - Is information given on the source/origin of the enzyme?                                                                                                                                                                                                           | ✗                     | ✓                  | ✓                      | ✗                     | ✗               | ✗                   | ✗                    | ✗                            | ✗                       | ✓              | ✗                | ✓                    | ✗                 | ✗                 | ✓                |

|                                                                                                                                                                                                                                                                                                                             |                          |                          |                          |                          |                          |                          |                          |                          |                          |                          |                          |                          |                          |                          |                          |
|-----------------------------------------------------------------------------------------------------------------------------------------------------------------------------------------------------------------------------------------------------------------------------------------------------------------------------|--------------------------|--------------------------|--------------------------|--------------------------|--------------------------|--------------------------|--------------------------|--------------------------|--------------------------|--------------------------|--------------------------|--------------------------|--------------------------|--------------------------|--------------------------|
| <p>7 - Is necessary information on test system properties and conditions given?</p> <p>a) Amount/concentration of enzyme (confirmed by measuring specific activity with no test inhibitors present and providing this value)</p> <p>b) Concentrations of positive (and negative if applicable) controls (e.g. acarbose)</p> | <input type="checkbox"/> |
| <p>8 - Is the test substance concentration range given?</p>                                                                                                                                                                                                                                                                 | <input type="checkbox"/> |
| <p>9 – Are observation time-points explained?</p>                                                                                                                                                                                                                                                                           | <input type="checkbox"/> |
| <p>10 – Were negative controls included?</p>                                                                                                                                                                                                                                                                                | <input type="checkbox"/> |
| <p>11 – Were positive controls included?</p>                                                                                                                                                                                                                                                                                | <input type="checkbox"/> |
| <p>12 – Is the number of replicates (and complete repetitions of the experiment) given?</p>                                                                                                                                                                                                                                 | <input type="checkbox"/> |
| <p>13 – Are the study endpoint(s) and their method(s) of determination clearly described?</p>                                                                                                                                                                                                                               | <input type="checkbox"/> |
| <p>14 – Is the description of the study results for all endpoints investigated transparent and complete?</p>                                                                                                                                                                                                                | <input type="checkbox"/> |
| <p>15 – Are the statistical analyses given and applied transparently?</p>                                                                                                                                                                                                                                                   | <input type="checkbox"/> |
| <p>16 – Is the chosen study design appropriate for obtaining the substance-specific data aimed for?</p>                                                                                                                                                                                                                     | <input type="checkbox"/> |

17 – Are the quantitative study results reliable?

|                                                                                     |                                                                                     |                                                                                     |                                                                                     |                                                                                     |                                                                                     |                                                                                     |                                                                                     |                                                                                     |                                                                                     |                                                                                     |                                                                                     |                                                                                     |                                                                                     |                                                                                     |                                                                                     |
|-------------------------------------------------------------------------------------|-------------------------------------------------------------------------------------|-------------------------------------------------------------------------------------|-------------------------------------------------------------------------------------|-------------------------------------------------------------------------------------|-------------------------------------------------------------------------------------|-------------------------------------------------------------------------------------|-------------------------------------------------------------------------------------|-------------------------------------------------------------------------------------|-------------------------------------------------------------------------------------|-------------------------------------------------------------------------------------|-------------------------------------------------------------------------------------|-------------------------------------------------------------------------------------|-------------------------------------------------------------------------------------|-------------------------------------------------------------------------------------|-------------------------------------------------------------------------------------|
|  |  |  |  |  |  |  |  |  |  |  |  |  |  |  |  |
|-------------------------------------------------------------------------------------|-------------------------------------------------------------------------------------|-------------------------------------------------------------------------------------|-------------------------------------------------------------------------------------|-------------------------------------------------------------------------------------|-------------------------------------------------------------------------------------|-------------------------------------------------------------------------------------|-------------------------------------------------------------------------------------|-------------------------------------------------------------------------------------|-------------------------------------------------------------------------------------|-------------------------------------------------------------------------------------|-------------------------------------------------------------------------------------|-------------------------------------------------------------------------------------|-------------------------------------------------------------------------------------|-------------------------------------------------------------------------------------|-------------------------------------------------------------------------------------|
